# Supplementary material for: Impact of Diabetes and Smoking on Mortality in Tuberculosis
Source: PubMed Central journal article supplement (PMC3585219; doi:10.1371/journal.pone.0058044), 2013-02-28

**Figure S1. Adjusted Diabetes\*age interaction model.**

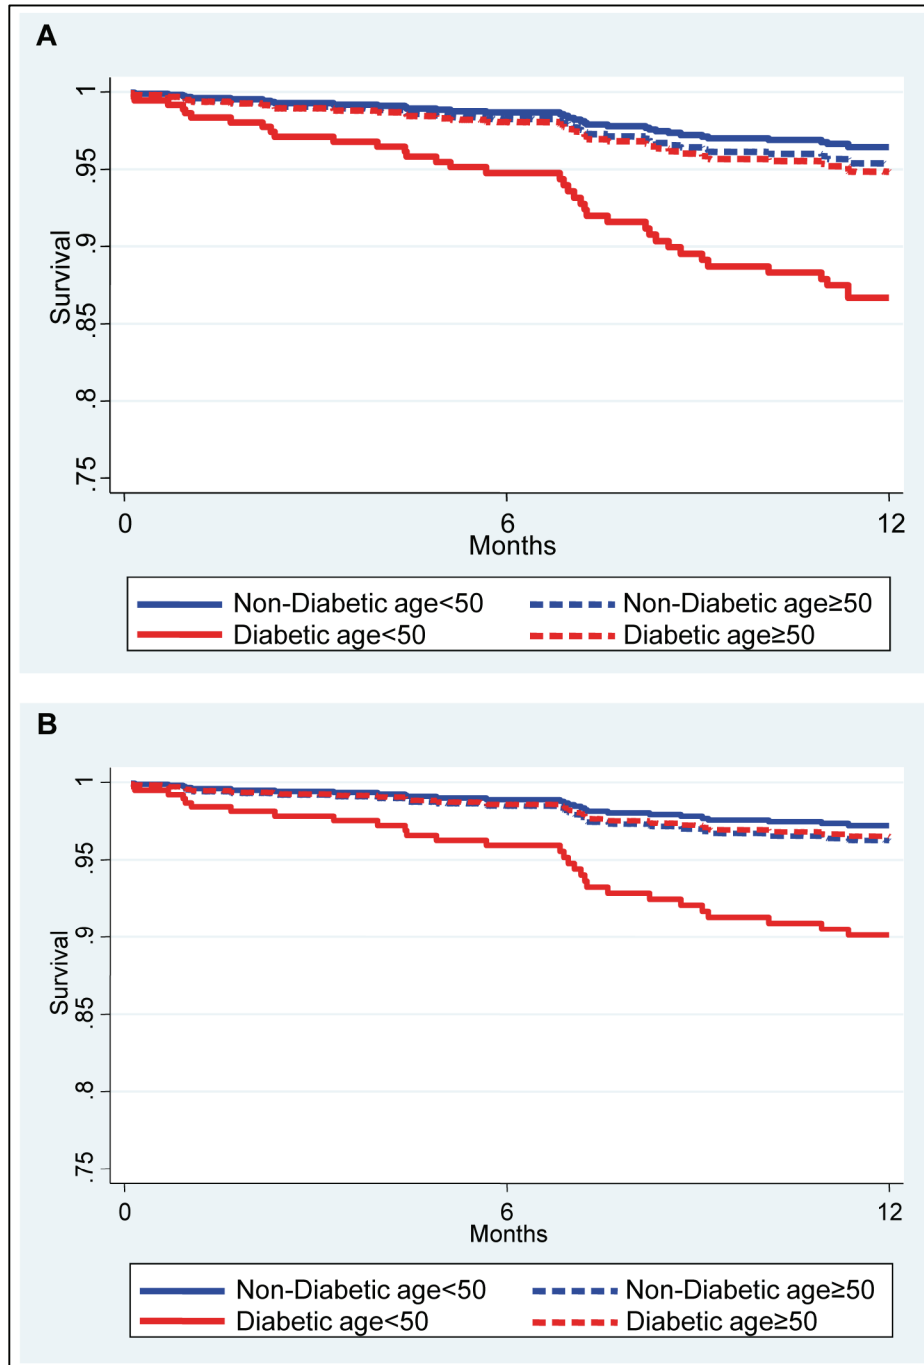

Supplement: pone.0058044.s001.pdf [file pone.0058044.s001.pdf]
